# Supplementary material for: Lots of movement, little progress: a review of reptile home range literature
Source: PeerJ journal article supplement (doi:10.7717/peerj.11742), 2021-07-20
Supplement: Supp_File_1_-_Summarising-Tracking-Data-Example.pdf [file Supp_File_1_-_Summarising-Tracking-Data-Example.pdf]

# Summarising Tracking Data

Matt Crane, Inês Silva, Benjamin Michael Marshall, Colin Thomas Strine

24/08/2020

We tracked 7 [SPECIES NAME] individuals for an average of  $649.7 \pm 112.27$  days. During the tracking period, we located individuals on average every  $8.51 \pm 0.09$  hours (mean time lag), and detected  $537 \pm 108.2$  moves per individual with a mean step length of  $60.98 \pm 1.63$  m.

Table 1: Summary of animal tracking

| Animal ID | # datapoints | Duration (days) | Mean time lag $\pm$ SE (hours) | # moves | Mean step length $\pm$ SE (m) |
|-----------|--------------|-----------------|--------------------------------|---------|-------------------------------|
| AF017     | 2245         | 774.97          | $8.29 \pm 0.11$                | 747     | $31.84 \pm 1.96$              |
| AM006     | 2173         | 723.05          | $7.99 \pm 0.17$                | 553     | $71.88 \pm 4.23$              |
| AM007     | 969          | 320.66          | $7.95 \pm 0.29$                | 225     | $72.24 \pm 6.71$              |
| AM015     | 1944         | 680.13          | $8.4 \pm 0.18$                 | 595     | $71.05 \pm 4.74$              |
| AM018     | 3122         | 1176.10         | $9.04 \pm 0.28$                | 1018    | $75.72 \pm 4.06$              |
| JM013     | 1497         | 561.19          | $9 \pm 0.17$                   | 390     | $48.35 \pm 3.31$              |
| JM019     | 890          | 311.79          | $8.42 \pm 0.21$                | 231     | $43.22 \pm 4.97$              |

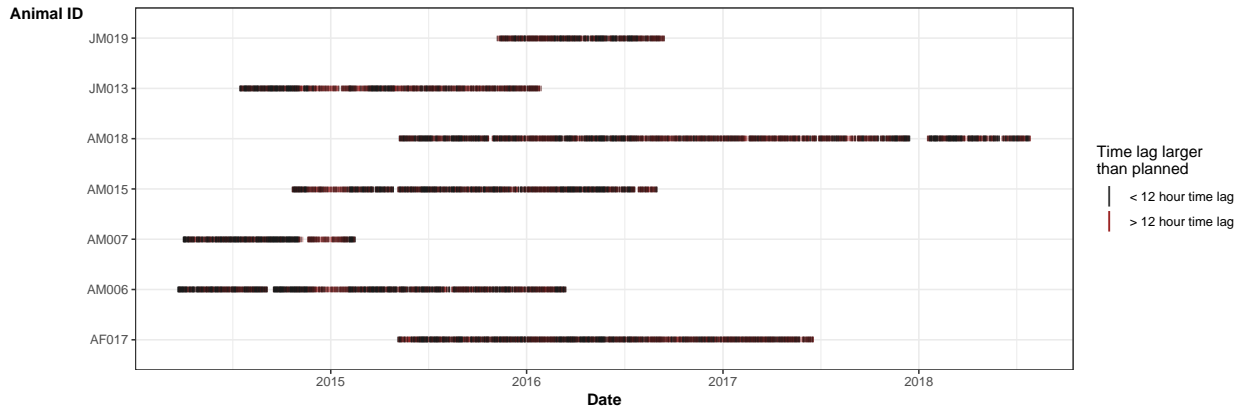

Figure 1: The tracking duration of all individuals.

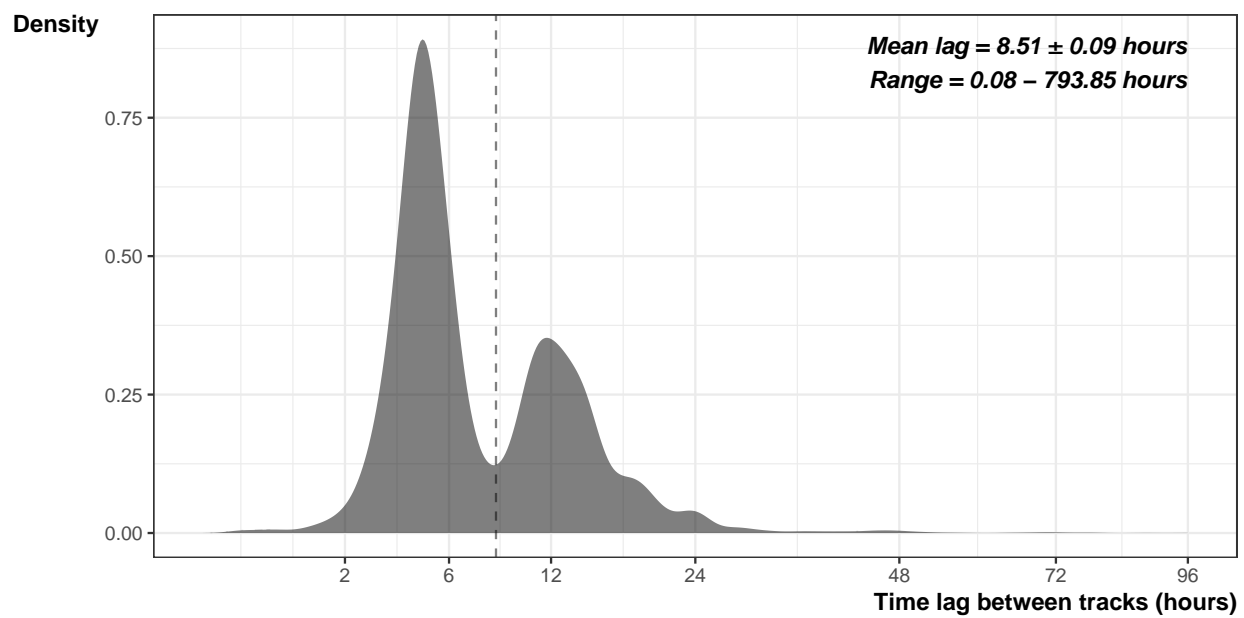

Figure 2: The distribution and mean (dashed line) lag time between tracks. Note, x-axis is square-rooted and truncated at 96 hours
